# Supplementary material
Source: PubMed Central journal article supplement (PMC11455507)

Figure S1

A

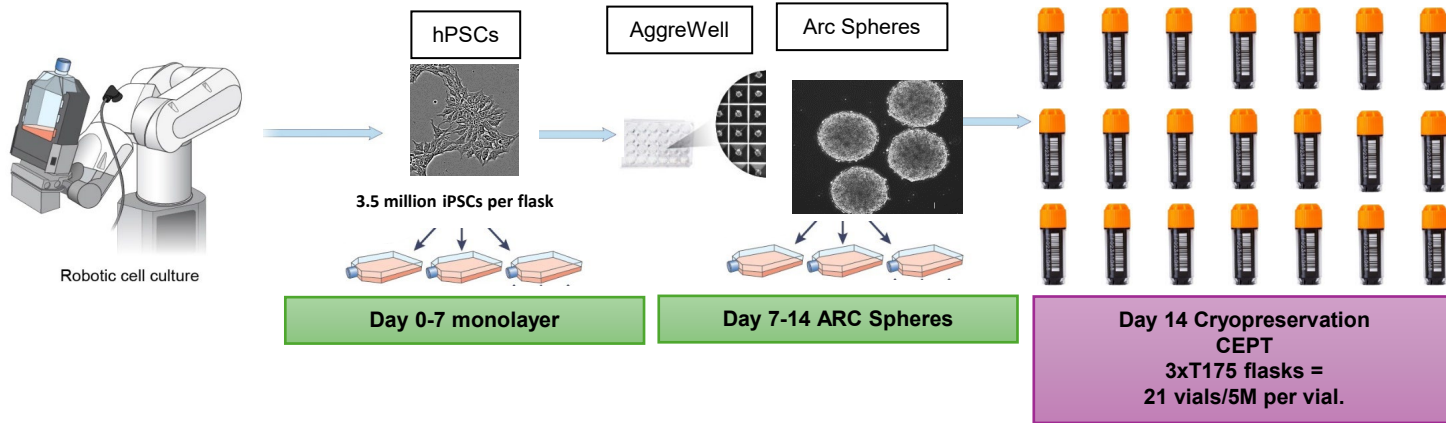

B

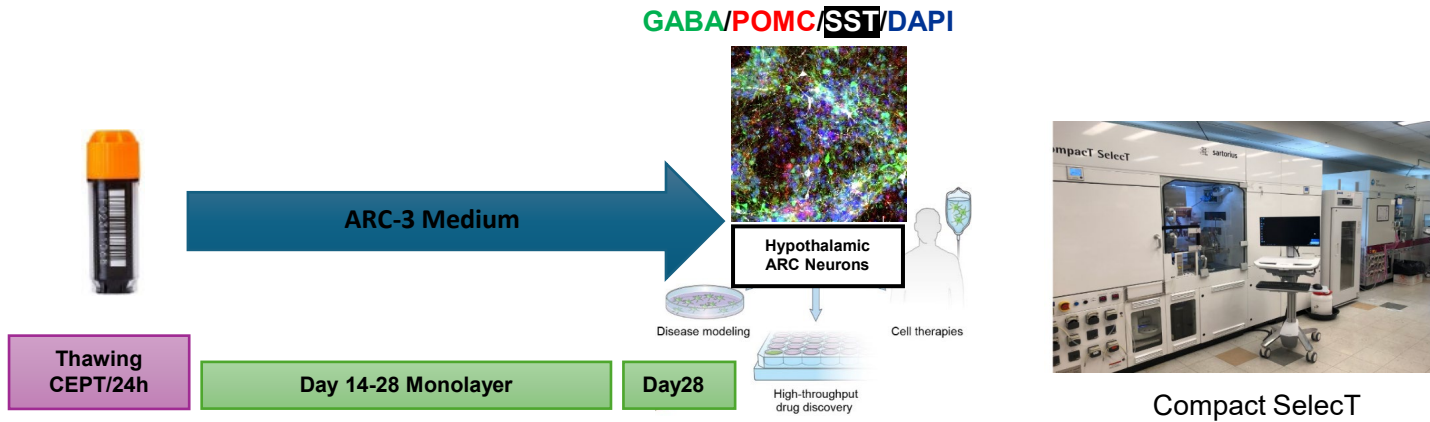

Figure S2

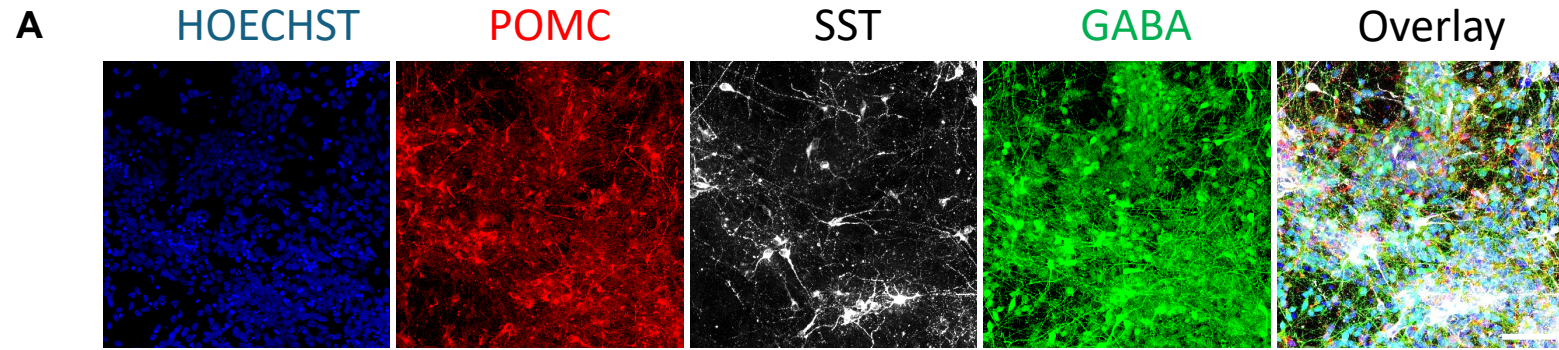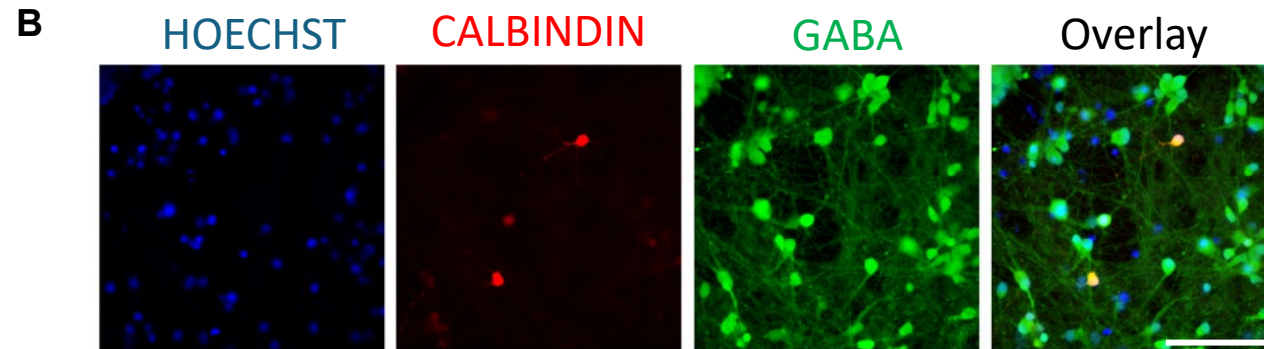

Figure S3

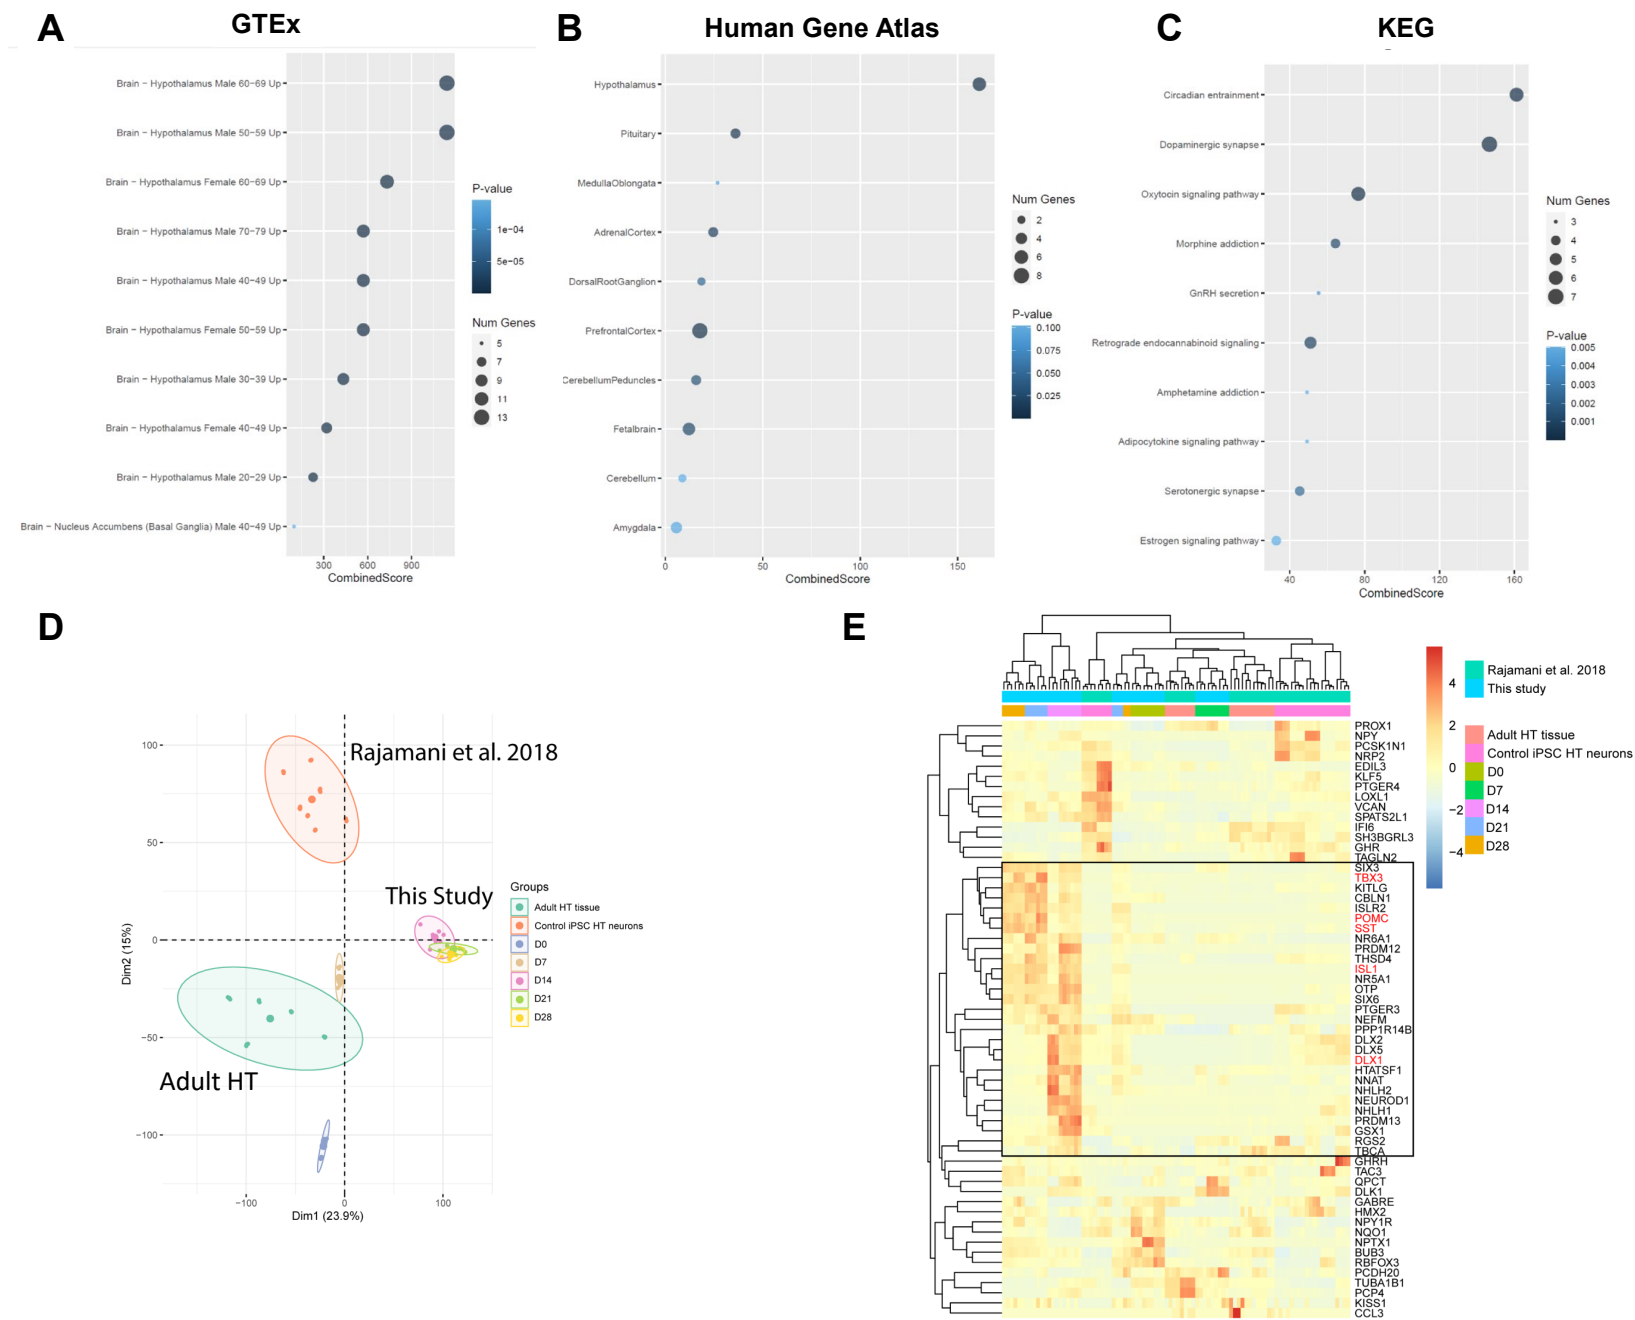

Figure S4

**A**

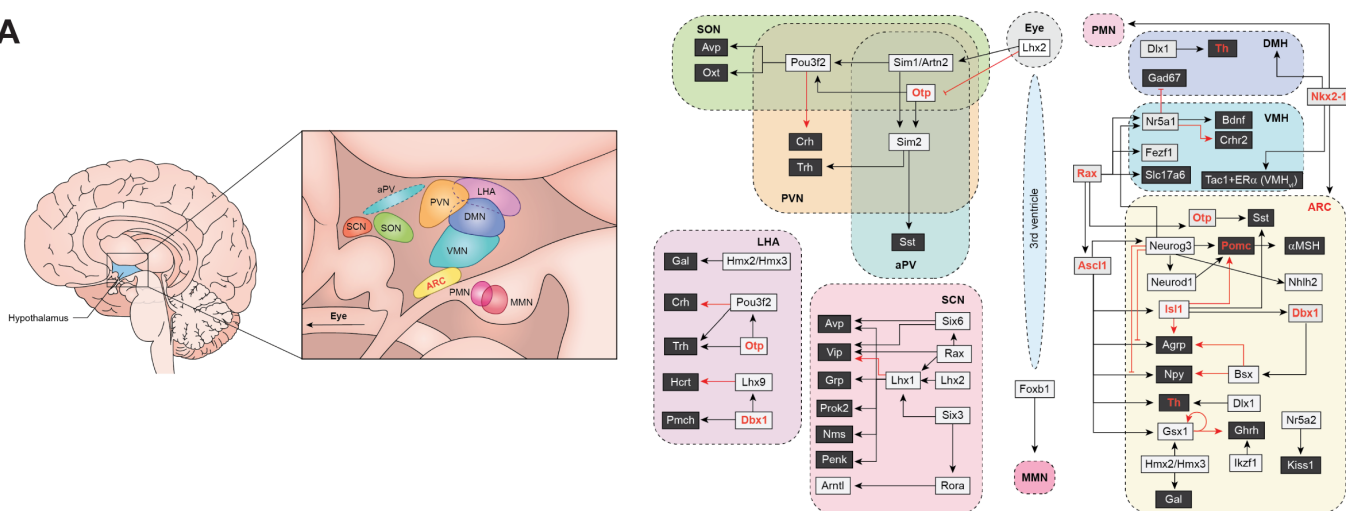

**B**

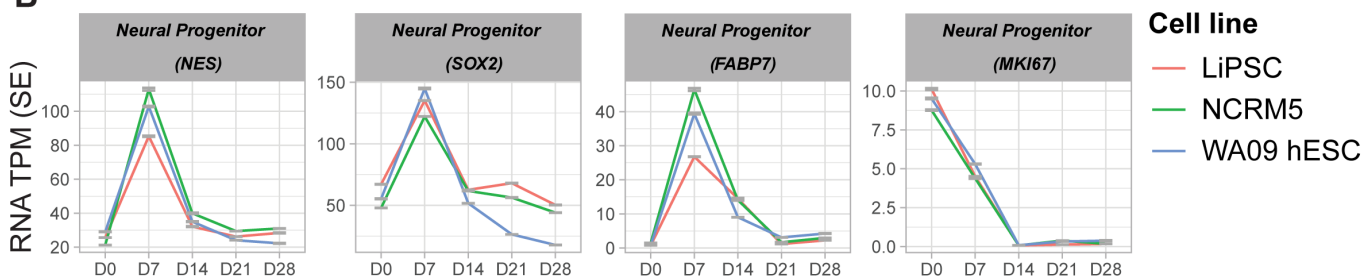

**C**

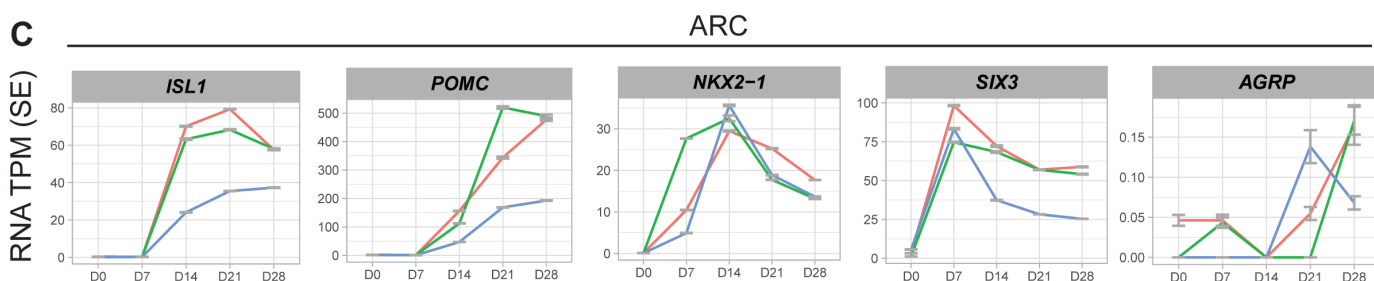

**D**

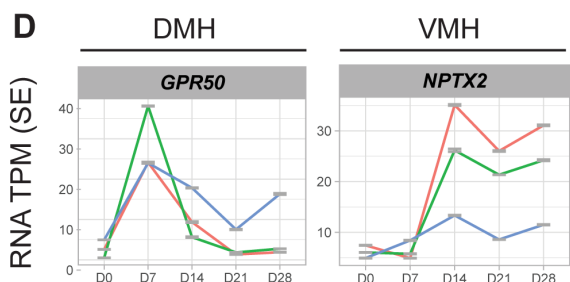

**E**

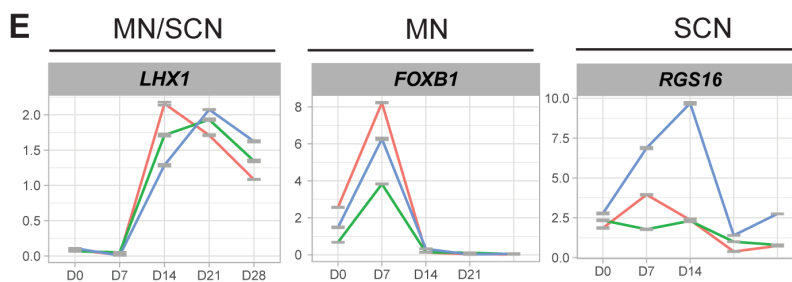

**F**

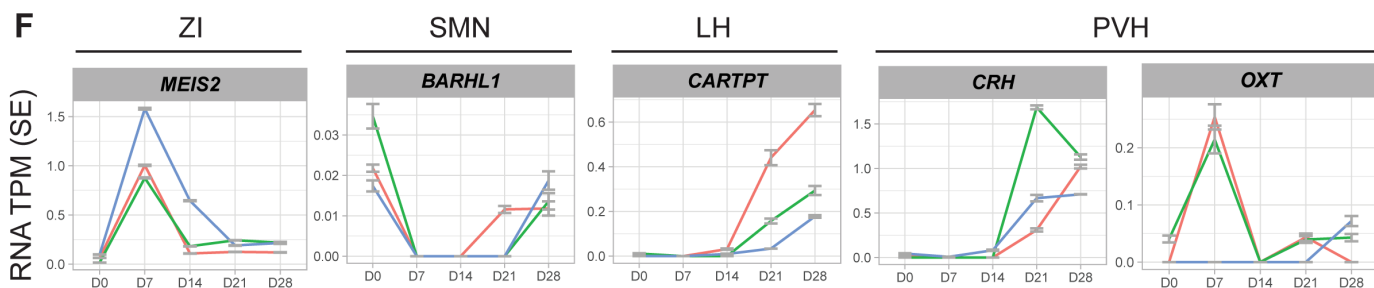

# Figure S5

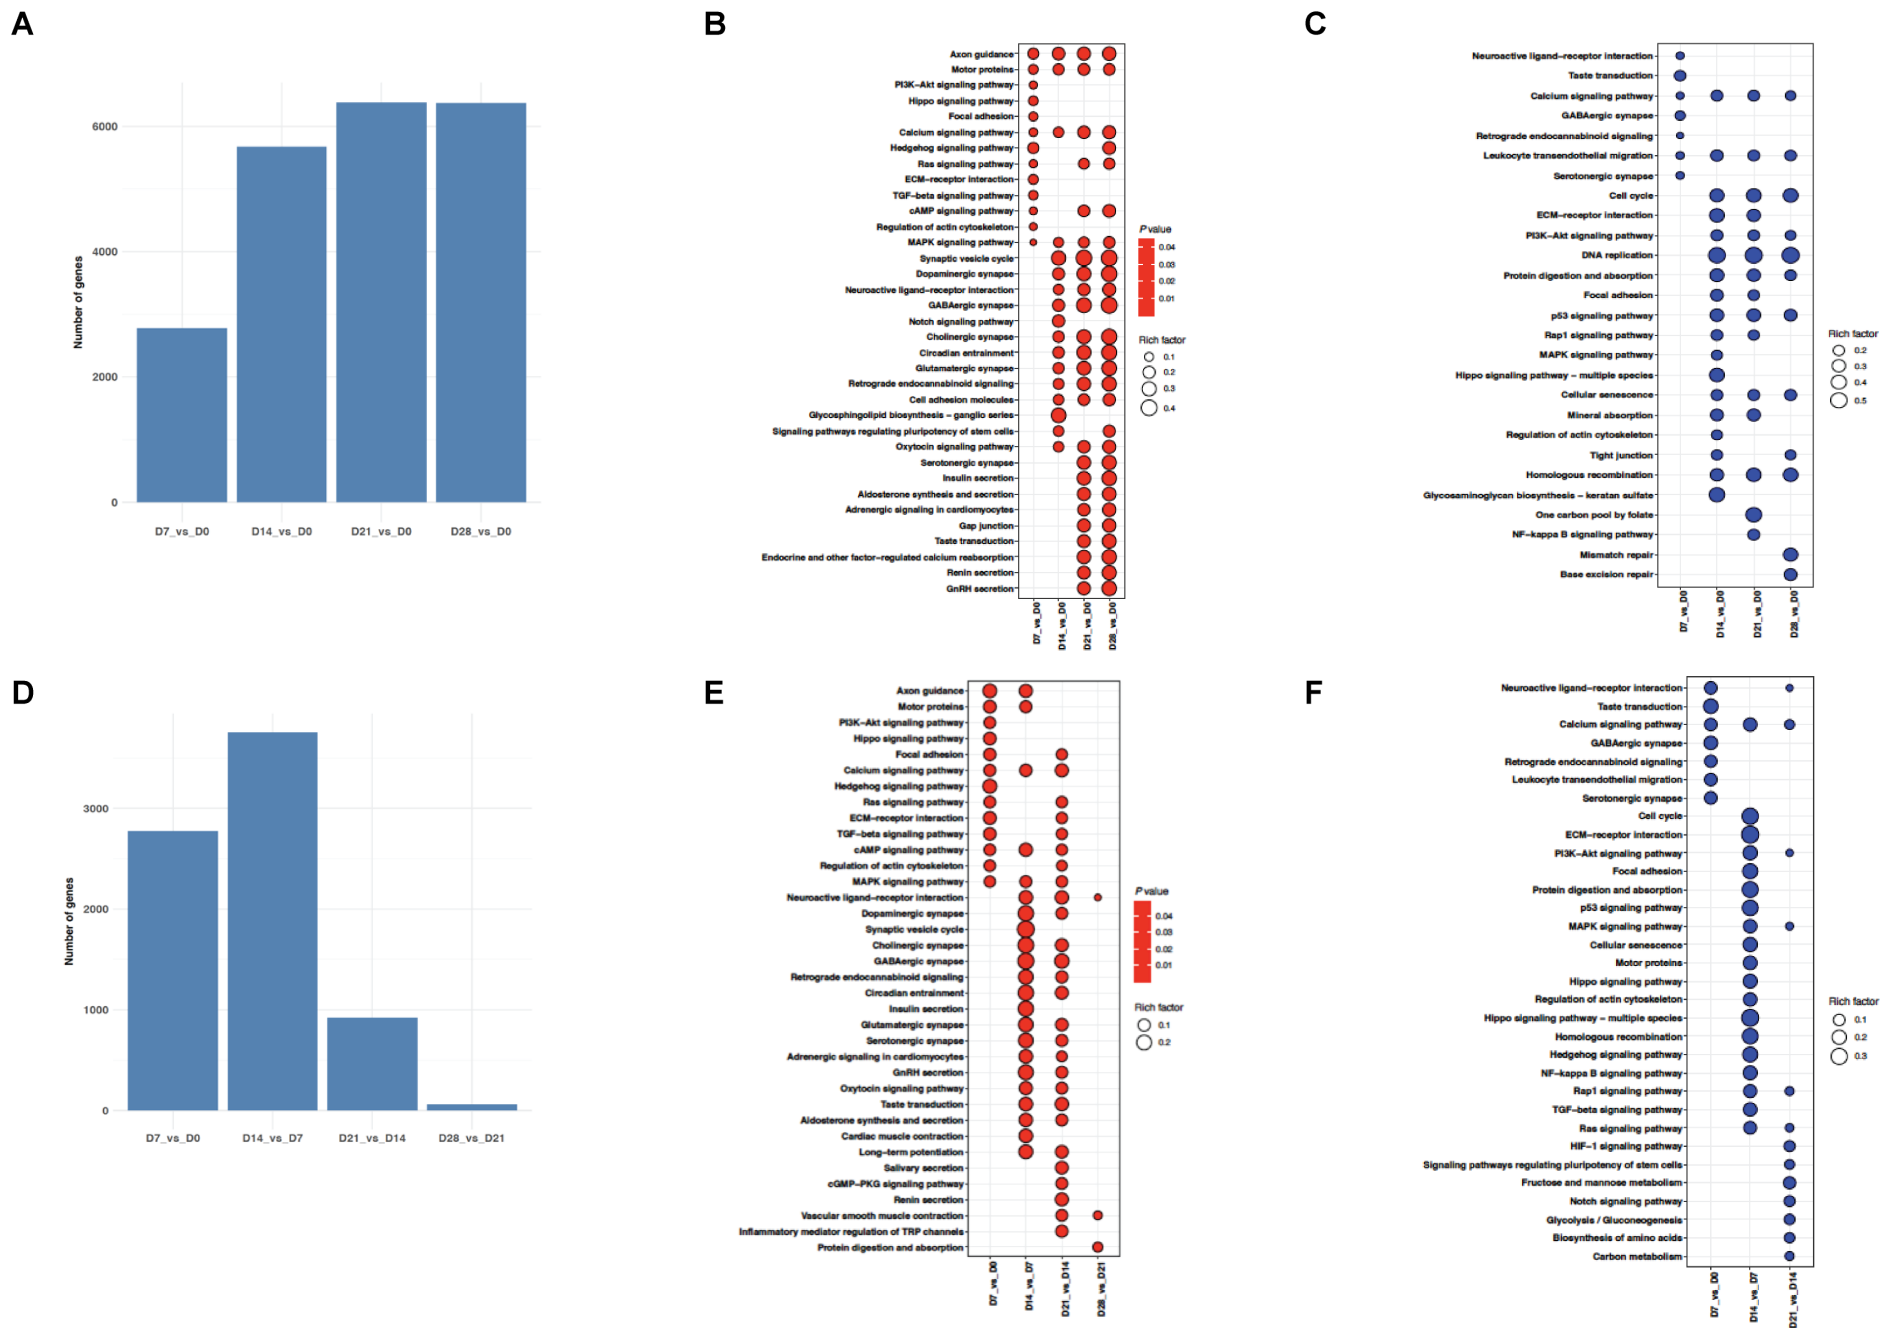

Supplement: media-2.pdf [file media-2.pdf]
